# Supplementary material for: Association of cardiac autonomic dysfunction with higher levels of plasma lipid metabolites in recent-onset type 2 diabetes
Source: Springer Nature journal article supplement (doi:10.1007/s00125-020-05310-5), 2020-10-21
Supplement: MOESM1 [file 18507936]

# Electronic Supplementary Material [ESM]

## Association of cardiac autonomic dysfunction with higher levels of plasma lipid metabolites in recent-onset type 2 diabetes

Dan Ziegler<sup>1,2,3</sup>, Alexander Strom<sup>1,3</sup>, Klaus Straßburger<sup>2,3</sup>, Birgit Knebel<sup>3,5</sup>, Gidon J. Bönhof<sup>1,2</sup>, Jörg Kotzka<sup>3,5</sup>, Julia Szendroedi<sup>1,2,3</sup>, Michael Roden<sup>1,2,3</sup>, for the GDS group

<sup>1</sup>Institute for Clinical Diabetology, German Diabetes Center (DDZ), Leibniz Center for Diabetes Research at Heinrich Heine University, Düsseldorf, Germany;

<sup>2</sup>Division of Endocrinology and Diabetology, Medical Faculty, Heinrich Heine University, Düsseldorf, Germany

<sup>3</sup>German Center for Diabetes Research (DZD), München-Neuherberg, Germany;

<sup>4</sup>Institute for Biometrics and Epidemiology, German Diabetes Center (DDZ), Leibniz Center for Diabetes Research at Heinrich Heine University, Düsseldorf, Germany;

<sup>5</sup>Institute for Clinical Biochemistry and Pathobiochemistry, German Diabetes Center (DDZ), Leibniz Center for Diabetes Research at Heinrich Heine University, Düsseldorf, Germany.

## **ESM Methods**

### **Heart rate variability indices**

To briefly explain the physiologic basis of the various HRV indices, the simplest variable to calculate HRV is the SDNN, i.e. the square root of variance. Since variance is mathematically equal to total power of spectral analysis, SDNN reflects all the cyclic components responsible for variability in the period of recording reflecting both vagal and sympathetic influences on HRV. Measures derived from interval differences such as RMSSD, SD, and pNN50 represent measures of short-term variation reflecting high frequency variations in heart rate and thus are highly correlated. Among the frequency domain HRV parameters, the HF power reflects respiratory influences on the heart rate or respiratory sinus arrhythmia. The representation of LF and HF in normalized units emphasizes the controlled and balanced behavior of the sympathetic and parasympathetic branches of the autonomic nervous system, respectively (1). The physiological explanation of the VLF band is much less defined, but it depends primarily on the presence of parasympathetic outflow and may relate to the renin-angiotensin-aldosterone system, thermoregulation, and/or peripheral vasomotor tone (2).

### **References**

1. Task Force of the European Society of Cardiology and the North American Society of Pacing and Electrophysiology. Heart rate variability: standards of measurement, physiological interpretation and clinical use. *Circulation* 1996; 93:1043-1065.
2. Draghici AE, Taylor JA. The physiological basis and measurement of heart rate variability in humans. *J Physiol Anthropol* 2016; Sep 28;35:22.

**ESM Table 1 – Relationship between NEFA and HRV measures in participants with recent-onset type 2 diabetes ( $P>0.05$  after Bonferroni correction except for the underlined values).**

|             | Time domain HRV indices |          |          |          |               |                   |          |          | Frequency domain HRV indices |          |          |          |          |          |
|-------------|-------------------------|----------|----------|----------|---------------|-------------------|----------|----------|------------------------------|----------|----------|----------|----------|----------|
|             | pNN50                   |          | RMSSD    |          | SDNN          |                   | SD       |          | VLF                          |          | LF       |          | HF       |          |
| <b>FFA</b>  | <i>r</i>                | <i>P</i> | <i>r</i> | <i>P</i> | <i>r</i>      | <i>P</i>          | <i>r</i> | <i>P</i> | <i>r</i>                     | <i>P</i> | <i>r</i> | <i>P</i> | <i>r</i> | <i>P</i> |
| C14:0       | -0.226                  | 0.001    | -0.200   | 0.004    | <u>-0.262</u> | <u>0.0002</u>     | -0.228   | 0.001    | -0.233                       | 0.001    | -0.202   | 0.005    | -0.183   | 0.011    |
| cC14:1w5    | -0.192                  | 0.006    | -0.170   | 0.015    | -0.253        | 0.0002            | -0.224   | 0.001    | -0.253                       | 0.0003   | -0.186   | 0.009    | -0.127   | 0.073    |
| C16:0       | -0.227                  | 0.001    | -0.200   | 0.004    | <u>-0.278</u> | <u>&lt;0.0001</u> | -0.253   | 0.0003   | -0.243                       | 0.001    | -0.232   | 0.001    | -0.203   | 0.004    |
| cC16:1w7    | -0.185                  | 0.008    | -0.159   | 0.022    | <u>-0.271</u> | <u>&lt;0.0001</u> | -0.241   | 0.0005   | -0.258                       | 0.0002   | -0.195   | 0.006    | -0.133   | 0.061    |
| C18:0       | -0.206                  | 0.003    | -0.192   | 0.006    | -0.213        | 0.002             | -0.199   | 0.004    | -0.185                       | 0.009    | -0.167   | 0.019    | -0.182   | 0.010    |
| cC18:1w9    | -0.198                  | 0.005    | -0.166   | 0.017    | -0.215        | 0.002             | -0.202   | 0.004    | -0.201                       | 0.004    | -0.140   | 0.049    | -0.152   | 0.032    |
| cC18:2w6    | -0.210                  | 0.003    | -0.191   | 0.006    | -0.258        | 0.0002            | -0.241   | 0.0005   | -0.233                       | 0.001    | -0.226   | 0.001    | -0.200   | 0.005    |
| cC20:4w6    | -0.162                  | 0.021    | -0.163   | 0.020    | -0.135        | 0.054             | -0.122   | 0.081    | -0.080                       | 0.260    | -0.149   | 0.036    | -0.173   | 0.015    |
| cC22:4w6    | -0.139                  | 0.047    | -0.134   | 0.055    | -0.166        | 0.017             | -0.158   | 0.023    | -0.172                       | 0.015    | -0.113   | 0.114    | -0.115   | 0.107    |
| cC22:5w3DPA | -0.171                  | 0.015    | -0.142   | 0.041    | -0.220        | 0.001             | -0.198   | 0.004    | -0.217                       | 0.002    | -0.214   | 0.002    | -0.167   | 0.019    |

*r* and *P*-value for Spearman rank correlation; no associations were observed after adjustment for sex, age, BMI, smoking status, HbA1c, fasting blood glucose, M-value, triglycerides, cholesterol, HDL, LDL, creatinine, proteinuria, insulin therapy, oral antidiabetic drugs, antihypertensive drugs, and lipid lowering drugs.

**ESM Table 2 – Relationship between phosphatidylcholines (PC) and lysophosphatidylcholines (lysoPC) and HRV measures in participants with recent-onset type 2 diabetes ( $P > 0.05$  after Bonferroni correction).**

|               | Time domain HRV indices |              |               |              |               |              |               |              | Frequency domain HRV indices |              |               |              |               |              |
|---------------|-------------------------|--------------|---------------|--------------|---------------|--------------|---------------|--------------|------------------------------|--------------|---------------|--------------|---------------|--------------|
|               | pNN50                   |              | RMSSD         |              | SDNN          |              | SD            |              | VLF                          |              | LF            |              | HF            |              |
| <b>PCaa</b>   | <i>r</i>                | <i>P</i>     | <i>r</i>      | <i>P</i>     | <i>r</i>      | <i>P</i>     | <i>r</i>      | <i>P</i>     | <i>r</i>                     | <i>P</i>     | <i>r</i>      | <i>P</i>     | <i>r</i>      | <i>P</i>     |
| C32:2         | -0.144                  | 0.039        | -0.142        | 0.042        | -0.231        | 0.001        | -0.213        | 0.002        | <b>-0.236</b>                | <b>0.001</b> | -0.190        | 0.007        | -0.103        | 0.149        |
| C34:3         | -0.138                  | 0.048        | -0.110        | 0.115        | <b>-0.233</b> | <b>0.001</b> | -0.225        | 0.001        | <b>-0.236</b>                | <b>0.001</b> | -0.173        | 0.014        | -0.069        | 0.335        |
| C34:4         | -0.079                  | 0.261        | -0.095        | 0.173        | -0.168        | 0.016        | -0.146        | 0.036        | -0.136                       | 0.047        | -0.131        | 0.065        | -0.060        | 0.397        |
| C36:1         | -0.193                  | 0.006        | -0.177        | 0.011        | -0.218        | 0.002        | -0.222        | 0.001        | -0.200                       | 0.005        | -0.156        | 0.028        | -0.121        | 0.089        |
| C36:2         | -0.165                  | 0.018        | -0.147        | 0.035        | -0.201        | 0.004        | -0.207        | 0.003        | -0.213                       | 0.003        | -0.174        | 0.014        | -0.130        | 0.068        |
| C36:3         | -0.122                  | 0.081        | -0.106        | 0.131        | -0.206        | 0.003        | -0.210        | 0.002        | <b>-0.225</b>                | <b>0.001</b> | -0.143        | 0.045        | -0.072        | 0.309        |
| C36:4         | -0.083                  | 0.234        | -0.112        | 0.109        | -0.157        | 0.024        | -0.155        | 0.026        | -0.160                       | 0.024        | -0.122        | 0.085        | -0.101        | 0.154        |
| C40:4         | -0.080                  | 0.254        | -0.081        | 0.249        | -0.150        | 0.031        | -0.158        | 0.024        | -0.165                       | 0.020        | -0.113        | 0.110        | -0.049        | 0.494        |
| C42:2         | -0.132                  | 0.059        | -0.122        | 0.082        | -0.188        | 0.007        | -0.178        | 0.010        | -0.127                       | 0.075        | <b>-0.203</b> | <b>0.004</b> | -0.142        | 0.045        |
| <b>PCae</b>   |                         |              |               |              |               |              |               |              |                              |              |               |              |               |              |
| C30:0         | -0.139                  | 0.046        | -0.127        | 0.070        | -0.195        | 0.005        | -0.171        | 0.014        | <b>-0.214</b>                | <b>0.002</b> | -0.174        | 0.014        | -0.117        | 0.100        |
| C32:1         | -0.164                  | 0.019        | <b>-0.145</b> | <b>0.038</b> | <b>-0.223</b> | <b>0.001</b> | <b>-0.217</b> | <b>0.002</b> | <b>-0.218</b>                | <b>0.002</b> | <b>-0.215</b> | <b>0.002</b> | <b>-0.137</b> | <b>0.053</b> |
| C34:0         | -0.181                  | 0.009        | -0.184        | 0.008        | -0.251        | 0.0003       | -0.221        | 0.001        | -0.251                       | 0.0003       | -0.240        | 0.001        | -0.179        | 0.011        |
| C34:1         | -0.173                  | 0.013        | -0.149        | 0.033        | -0.232        | 0.001        | -0.211        | 0.002        | <b>-0.243</b>                | <b>0.001</b> | -0.202        | 0.004        | -0.128        | 0.072        |
| <b>lysoPC</b> |                         |              |               |              |               |              |               |              |                              |              |               |              |               |              |
| C16:0         | -0.106                  | 0.131        | -0.099        | 0.159        | <b>-0.169</b> | <b>0.015</b> | <b>-0.152</b> | <b>0.030</b> | <b>-0.208</b>                | <b>0.003</b> | <b>-0.203</b> | <b>0.004</b> | <b>-0.097</b> | <b>0.173</b> |
| C16:1         | <b>-0.131</b>           | <b>0.062</b> | <b>-0.130</b> | <b>0.062</b> | <b>-0.201</b> | <b>0.004</b> | <b>-0.178</b> | <b>0.010</b> | <b>-0.201</b>                | <b>0.004</b> | <b>-0.181</b> | <b>0.011</b> | <b>-0.104</b> | <b>0.145</b> |

*r* and *P*-value for Spearman rank correlation (all *P*-values are not significant after Bonferroni correction); **boldface** indicates  $P < 0.05$  after adjustment for sex, age, BMI, smoking status, HbA1c, fasting blood glucose, M-value, triglycerides, cholesterol, HDL, LDL, creatinine, proteinuria, insulin therapy, oral antidiabetic drugs, antihypertensive drugs, and lipid lowering drugs.

Abbreviations: aa, diacyl; ae, acyl-alkyl; lysoPC, lysophosphatidylcholines

**ESM Table 3 – Relationship between sphingomyelins (SM) and HRV measures in participants with recent-onset type 2 diabetes (P>0.05 after Bonferroni correction).**

|           | Time domain HRV indices |              |               |              |               |              |               |              | Frequency domain HRV indices |              |               |              |               |             |
|-----------|-------------------------|--------------|---------------|--------------|---------------|--------------|---------------|--------------|------------------------------|--------------|---------------|--------------|---------------|-------------|
|           | pNN50                   |              | RMSSD         |              | SDNN          |              | SD            |              | VLF                          |              | LF            |              | HF            |             |
| <b>SM</b> | <i>r</i>                | <i>P</i>     | <i>r</i>      | <i>P</i>     | <i>r</i>      | <i>P</i>     | <i>r</i>      | <i>P</i>     | <i>r</i>                     | <i>P</i>     | <i>r</i>      | <i>P</i>     | <i>r</i>      | <i>P</i>    |
| C18:0     | -0.180                  | 0.010        | -0.179        | 0.010        | -0.220        | 0.001        | -0.209        | 0.003        | -0.190                       | 0.007        | -0.165        | 0.020        | -0.147        | 0.039       |
| C24:0     | -0.178                  | 0.011        | -0.177        | 0.011        | <b>-0.191</b> | <b>0.006</b> | <b>-0.192</b> | <b>0.006</b> | <b>-0.143</b>                | <b>0.045</b> | <b>-0.125</b> | <b>0.079</b> | -0.165        | 0.020       |
| C24:1     | <b>-0.177</b>           | <b>0.011</b> | <b>-0.151</b> | <b>0.030</b> | <b>-0.193</b> | <b>0.005</b> | <b>-0.184</b> | <b>0.008</b> | <b>-0.142</b>                | <b>0.045</b> | <b>-0.176</b> | <b>0.013</b> | <b>-0.163</b> | <b>0.02</b> |

*r* and *P*-value for Spearman rank correlation (all *P*-values are not significant after Bonferroni correction); **boldface** indicates  $P < 0.05$  after adjustment for sex, age, BMI, smoking status, HbA1c, fasting blood glucose, M-value, triglycerides, cholesterol, HDL, LDL, creatinine, proteinuria, insulin therapy, oral antidiabetic drugs, antihypertensive drugs, and lipid lowering drugs.

**ESM Table 4 – Relationship between acylcarnitines (AC) and HRV measures in participants with recent-onset type 2 diabetes (P>0.05 after Bonferroni correction).**

|       | Time domain HRV indices |          |          |          |          |          |          |          | Frequency domain HRV indices |              |          |          |          |          |
|-------|-------------------------|----------|----------|----------|----------|----------|----------|----------|------------------------------|--------------|----------|----------|----------|----------|
|       | pNN50                   |          | RMSSD    |          | SDNN     |          | SD       |          | VLF                          |              | LF       |          | HF       |          |
| AC    | <i>r</i>                | <i>P</i> | <i>r</i> | <i>P</i> | <i>r</i> | <i>P</i> | <i>r</i> | <i>P</i> | <i>r</i>                     | <i>P</i>     | <i>r</i> | <i>P</i> | <i>r</i> | <i>P</i> |
| C14:1 | -0.179                  | 0.010    | -0.154   | 0.027    | -0.222   | 0.001    | -0.211   | 0.002    | <b>-0.218</b>                | <b>0.002</b> | -0.191   | 0.007    | -0.202   | 0.004    |
| C16   | -0.210                  | 0.002    | -0.192   | 0.006    | -0.229   | 0.001    | -0.212   | 0.002    | -0.230                       | 0.001        | -0.213   | 0.003    | -0.232   | 0.001    |
| C18   | -0.181                  | 0.010    | -0.177   | 0.011    | -0.144   | 0.039    | -0.133   | 0.057    | -0.118                       | 0.096        | -0.142   | 0.046    | -0.204   | 0.004    |
| C18:1 | -0.157                  | 0.025    | -0.139   | 0.046    | -0.164   | 0.019    | -0.162   | 0.020    | -0.160                       | 0.024        | -0.138   | 0.051    | -0.170   | 0.016    |

*r* and *P*-value for Spearman rank correlation (all *P*-values are not significant after Bonferroni correction); **boldface** indicates  $P < 0.05$  after adjustment for sex, age, BMI, smoking status, HbA1c, fasting blood glucose, M-value, triglycerides, cholesterol, HDL, LDL, creatinine, proteinuria, insulin therapy, oral antidiabetic drugs, antihypertensive drugs, and lipid lowering drugs.

**ESM Table 5 – Relationship between lipid metabolites and HRV measures in participants with recent-onset type 1 diabetes (listed are only bivariate correlations with  $P < 0.005$  for at least one HRV index before adjustment;  $P > 0.05$  for all correlations after adjustment for sex, age, BMI, smoking status, HbA1c, fasting blood glucose, M-value, triglycerides, cholesterol, HDL, LDL, creatinine, proteinuria, insulin therapy, oral antidiabetic drugs, antihypertensive drugs, and lipid lowering drugs).**

|               | Time domain HRV indices |          |          |          |          |          |          |          | Frequency domain HRV indices |          |          |          |          |          |
|---------------|-------------------------|----------|----------|----------|----------|----------|----------|----------|------------------------------|----------|----------|----------|----------|----------|
|               | pNN50                   |          | RMSSD    |          | SDNN     |          | SD       |          | VLF                          |          | LF       |          | HF       |          |
| Metabolite    | <i>r</i>                | <i>P</i> | <i>r</i> | <i>P</i> | <i>r</i> | <i>P</i> | <i>r</i> | <i>P</i> | <i>r</i>                     | <i>P</i> | <i>r</i> | <i>P</i> | <i>r</i> | <i>P</i> |
| AC C3         | -0.267                  | 0.007    | -0.275   | 0.006    | -0.165   | 0.101    | -0.161   | 0.110    | -0.098                       | 0.347    | -0.131   | 0.207    | -0.294   | 0.004    |
| PCaa C40:5    | -0.273                  | 0.006    | -0.275   | 0.006    | -0.294   | 0.003    | -0.307   | 0.002    | -0.189                       | 0.054    | -0.201   | 0.051    | -0.238   | 0.020    |
| PCaa C40:6    | -0.325                  | 0.001    | -0.318   | 0.001    | -0.330   | 0.001    | -0.310   | 0.002    | -0.217                       | 0.035    | -0.299   | 0.003    | -0.335   | 0.001    |
| PCaa C42:5    | -0.229                  | 0.023    | -0.220   | 0.028    | -0.280   | 0.005    | -0.269   | 0.007    | -0.223                       | 0.030    | -0.217   | 0.036    | -0.232   | 0.036    |
| lysoPC aC20:3 | 0.150                   | 0.137    | 0.143    | 0.155    | 0.248    | 0.013    | 0.214    | 0.032    | 0.307                        | 0.003    | 0.382    | 0.0001   | 0.151    | 0.143    |
| lysoPC aC20:4 | 0.124                   | 0.217    | 0.117    | 0.245    | 0.227    | 0.023    | 0.205    | 0.041    | 0.292                        | 0.004    | 0.318    | 0.002    | 0.147    | 0.155    |
| SM OH C22:2   | -0.234                  | 0.019    | -0.234   | 0.019    | -0.309   | 0.002    | -0.265   | 0.008    | -0.208                       | 0.043    | -0.270   | 0.008    | -0.205   | 0.047    |
| SM C16:1      | -0.232                  | 0.020    | -0.234   | 0.019    | -0.299   | 0.003    | -0.275   | 0.006    | -0.263                       | 0.010    | -0.228   | 0.026    | -0.230   | 0.025    |
| SM C18:0      | -0.291                  | 0.003    | -0.282   | 0.004    | -0.262   | 0.009    | -0.254   | 0.011    | -0.209                       | 0.042    | -0.163   | 0.114    | -0.306   | 0.003    |
| SM C18:1      | -0.265                  | 0.008    | -0.268   | 0.007    | -0.315   | 0.001    | -0.313   | 0.002    | -0.272                       | 0.008    | -0.218   | 0.034    | -0.253   | 0.013    |

Abbreviations: aa, diacyl; PC, phosphatidylcholines; lysoPC, lysophosphatidylcholines; AC, acylcarnitines; SM, sphingomyelins.

**ESM Table 6 – Demographic and clinical characteristics at baseline and 5-years follow-up**

| Variable                                                          | Type 1 diabetes (n=60) |                    | Type 2 diabetes (n=95) |                    |
|-------------------------------------------------------------------|------------------------|--------------------|------------------------|--------------------|
|                                                                   | Baseline               | 5-years            | Baseline               | 5-years            |
| <i>n</i> (% male)                                                 | 60 (68)                |                    | 95 (71)                |                    |
| Age (years)                                                       | 34.9±13.2              | 40.0±13.1*         | 53.6±10.5              | 58.7±10.5*         |
| BMI (kg/m <sup>2</sup> )                                          | 24.1±3.8               | 25.5±3.2*          | 32.0±5.9               | 31.9±6.0           |
| Current smoking status (% yes)                                    | 18.3                   | 20.0               | 16.8                   | 16.8               |
| Heart rate (bpm) <sup>§</sup>                                     | 68.9±10.1              | 70.8±10.0          | 70.1±9.3               | 71.2±9.7           |
| Systolic blood pressure (mmHg) <sup>§</sup>                       | 118±13                 | 121±13             | 131±14                 | 132±16             |
| Diastolic blood pressure (mmHg) <sup>§</sup>                      | 66.1±9.1               | 67.2±8.1           | 73.5±8.6               | 72.2±8.7           |
| Triglycerides (mmol/l) <sup>§</sup>                               | 0.72 (0.54, 0.97)      | 0.81 (0.60, 1.16)* | 1.57 (1.12, 2.32)      | 1.84 (1.31, 2.74)* |
| Cholesterol (mmol/l) <sup>§</sup>                                 | 4.58±0.96              | 4.84±1.03*         | 5.39±1.01              | 5.48±1.07          |
| HDL cholesterol (mmol/l) <sup>§</sup>                             | 1.55±0.42              | 1.71±0.54*         | 1.19±0.33              | 1.27±0.38*         |
| LDL cholesterol (mmol/l) <sup>§</sup>                             | 2.63±0.82              | 2.81±0.84*         | 3.36±0.90              | 3.55±0.92*         |
| Creatinine (nmol/l)                                               | 78.5±12.8              | 76.0±13.4          | 82.1±15.0              | 77.4±16.4*         |
| HbA1c (%)                                                         | 6.6±1.0                | 6.9±1.0*           | 6.3±0.7                | 6.8±0.9*           |
| HbA1c (mol/mmol)                                                  | 48.6±11.1              | 52.2±10.5*         | 45.6±7.9               | 50.3±9.9*          |
| Fasting glucose (mmol/l)                                          | 7.78±2.74              | 8.21±2.99          | 7.05±1.68              | 8.18±2.15*         |
| M-value (mg * kg <sup>-1</sup> * min <sup>-1</sup> ) <sup>§</sup> | 8.32 (5.98, 10.40)     | 6.38 (4.72, 8.10)* | 6.22 (4.27, 7.81)      | 5.79 (4.53, 7.29)  |
| Antihypertensive drugs (%)                                        | 3.8                    | 13.2               | 65.4                   | 80.2*              |
| Albuminuria (mg/l) <sup>§</sup>                                   | 14.9±11.2              | 7.2±21.2*          | 17.5±17.2              | 14.1±51.6*         |
| Subclinical/borderline CAN (%)                                    | 2.1                    | 0.0                | 4.5                    | 7.6                |
| Definite CAN (%)                                                  | 0.0                    | 4.2                | 3.0                    | 10.6               |

Data are shown as %, mean±SD, or median (first, third quartile); \**p*<0.05 vs baseline.

Abbreviations: CAN, cardiovascular autonomic neuropathy; HDL, high-density lipoprotein; LDL, low-density lipoprotein.



**ESM Table 7 – Follow-up of heart rate variability (HRV) after 5 years.**

| HRV variables                                                       | Type 1 diabetes   |                           | Type 2 diabetes   |                          |
|---------------------------------------------------------------------|-------------------|---------------------------|-------------------|--------------------------|
|                                                                     | Baseline          | 5 years <sup>a</sup>      | Baseline          | 5 years <sup>a</sup>     |
| <i>Time domain HRV indices</i><br>pNN50 (%)                         | 12.6 (6.4, 25.5)  | 12.1 (5.2, 30.0)          | 5.3 (2.0, 18.3)   | 5.5 (2.4, 14.4)          |
| RMSSD (ms)                                                          | 37.8 (28.7, 52.0) | 34.9 (26.9, 56.6)         | 28.8 (21.4, 43.4) | 29.7 (23.4, 43.4)        |
| SDNN (ms)                                                           | 66.7 (52.5, 86.7) | 71.6 (51.7, 90.8)         | 51.9 (41.1, 67.5) | 53.2 (42.7, 71.2)        |
| SD (ms)                                                             | 72.8 (58.9, 90.5) | <b>83.3 (67.2, 100.2)</b> | 62.8 (48.7, 79.9) | <b>70.7 (56.6, 87.9)</b> |
| <i>Frequency domain HRV indices</i><br>VLF power (ms <sup>2</sup> ) | 2015 (1437, 3263) | <b>2767 (1718, 3930)</b>  | 1466 (871, 2601)  | 1647 (1034, 2676)        |
| LF power (ms <sup>2</sup> )                                         | 1209 (748, 2143)  | 1373 (706, 2094)          | 659 (391, 1170)   | 614 (339, 1053)          |
| HF power (ms <sup>2</sup> )                                         | 351 (188, 743)    | 342 (203, 809)            | 170 (98, 354)     | 189 (107, 396)           |

Data are shown as median (first, third quartile). Boldface indicates  $p < 0.05$  vs baseline (Wilcoxon signed-rank test). <sup>a</sup> Values represent the sum of the original values and the added age-dependent 5-year changes in the corresponding HRV indices obtained from the regressions computed in glucose-tolerant individuals from the GDS study.

Following equations/syntaxes for 5-years follow-up age adjustment, calculated using 167 glucose-tolerant individuals from the GDS study, were applied:

COMPUTE pNN50\_change=EXP(4.676 - 0.063 \* AGE\_follow-up) - EXP(4.676 - 0.063 \* AGE\_baseline). EXECUTE.

COMPUTE RMSSD\_change=EXP(4.490 - 0.022 \* AGE\_follow-up) - EXP(4.490 - 0.022 \* AGE\_baseline). EXECUTE.

COMPUTE SDNN\_change=EXP(4.764 - 0.014 \* AGE\_follow-up) - EXP(4.764 - 0.014 \* AGE\_baseline). EXECUTE.

COMPUTE SD\_change=EXP(4.988 - 0.013 \* AGE\_follow-up) - EXP(4.988 - 0.013 \* AGE\_baseline). EXECUTE.

COMPUTE VLF\_change=EXP(8.810 - 0.025 \* AGE\_follow-up) - EXP(8.810 - 0.025 \* AGE\_baseline). EXECUTE.

COMPUTE LF\_change=EXP(8.226 - 0.034 \* AGE\_follow-up) - EXP(8.226 - 0.034 \* AGE\_baseline). EXECUTE.

COMPUTE HF\_change=EXP(7.727 - 0.050 \* AGE\_follow-up) - EXP(7.727 - 0.050 \* AGE\_baseline). EXECUTE.
